# Supplementary material for: A Novel Integrated Active Herbal Formulation Ameliorates Dry Eye Syndrome by Inhibiting Inflammation and Oxidative Stress and Enhancing Glycosylated Phosphoproteins in Rats
Source: PubMed Central journal article supplement (PMC7599565; doi:10.3390/ph13100295), 2020-10-07
Supplement: pharmaceuticals-13-00295-s001.pdf [file pharmaceuticals-13-00295-s001.pdf]

SUPPLEMENTARY FIGURES

A Novel Integrated Active Herbal Formulation Ameliorates Dry Eye Syndrome by Inhibiting Inflammation and Oxidative Stress and Enhancing Glycosylated Phosphoproteins in Rats

Omer Ersin Muz, Cemal Orhan, Fusun Erten, Mehmet Tuzcu, Ibrahim Hanifi Ozercan, Prafull Singh, Abhijeet Morde, Muralidhara Padigaru<sup>5</sup>, Deshanie Rai<sup>5</sup>, Kazim Sahin<sup>2\*</sup>

```
Data file : D:\CHEM32\DATA\2020\JULY\NG CURCUMIN\NGUS CURCUMIN ACCURACY->
Sample Name: STANDARD_WS/CUR/005 1
=====
Injection Date : Sat, 11. Jul. 2020 Seq Line : 2
Sample Name : STANDARD_WS/CUR/005 Location : Vial 2
Acq Operator : KINJAL Inj. No. : 3
Inj. Vol. : 20 µl

Acq. Method : D:\Chem32\Data\2020\JULY\NG CURCUMIN\NGUS CURCUMIN ->
Analysis Method : D:\CHEM32\METHOD\CURCUMIN P.M\CURCUMIN P.M
```

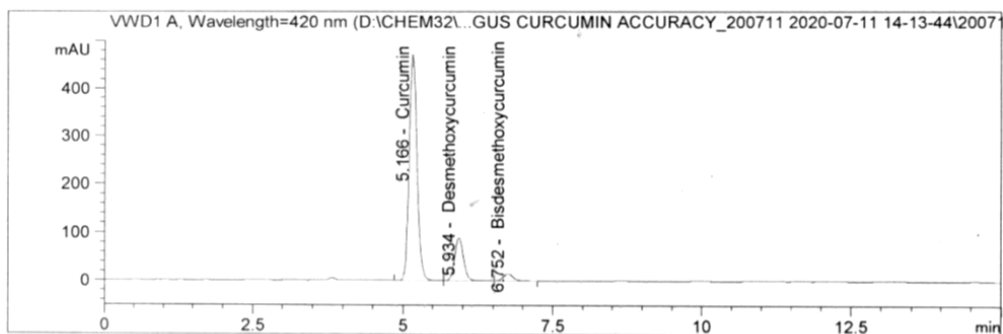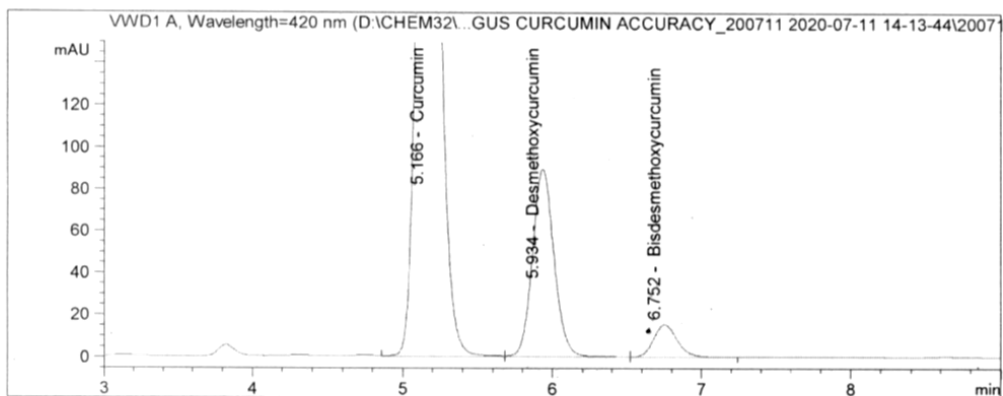

Signal 0: VWD1 A, Wavelength=420 nm

| Peak # | Name                  | RT [min] | Area     | Height  | Area % | Symmetry |
|--------|-----------------------|----------|----------|---------|--------|----------|
| 1      | Curcumin              | 5.166    | 4315.830 | 470.371 | 80.089 | 0.863    |
| 2      | Desmethoxycurcumin    | 5.934    | 903.635  | 89.261  | 16.769 | 0.883    |
| 3      | Bisdesmethoxycurcumin | 6.752    | 169.298  | 15.344  | 3.142  | 0.813    |

Figure S1. HPLC chromatograms of curcuminoids

Data file : D:\CHEM32\DATA\2020\MAY\DRY EYES\DRY EYE LUTEIN\_200514 1  
 2020-05-14 11-31-51\200514000004.D

=====  
 Injection Date & Time: Thu, 14. May. 2020 12:37:48 PM  
 Sample Name : STD WS/LZO/002  
 Acq Operator : AP Seq Line : 3  
 Location : Vial 2 Inj.Vol.:20 µl Inj. No. : 2  
 Acq. Method : D:\Chem32\Data\2020\MAY\DRY EYES\DRY EYE LUTEIN\_200514  
 2020-05-14 11-31-51\DRY EYE GRADIENT13.M  
 Analysis Method : D:\CHEM32\METHOD\DRY EYE GRADIENT13.M

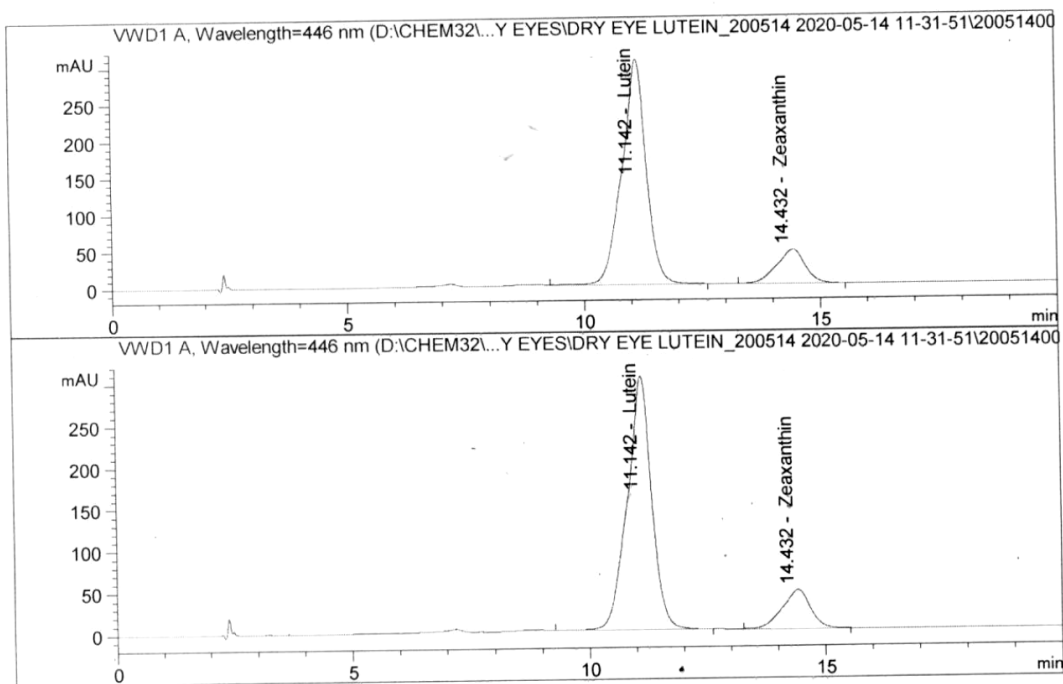

Signal 1: VWD1 A, Wavelength=446 nm

| Peak # | Name       | RT [min] | Area     | Height | Height % | Area  |
|--------|------------|----------|----------|--------|----------|-------|
| 1      | Lutein     | 11.14    | 10772.57 | 303.89 | 86.86    | 85.07 |
| 2      | Zeaxanthin | 14.43    | 1890.74  | 45.99  | 13.14    | 14.93 |

Figure S2. HPLC Chromatograms of lutein and zeaxanthin

**Area % Report**

Sample Name: Standard Solution

Data File: C:\Enterprise\Projects\2020\JULY\RESULT\DRY EYE\Vitamin D3\20200716\_Precision.rsl\002\_Standard Solution-Rep1.dat

Method: C:\Enterprise\Projects\2020\Methods\Vitamin D3\STD 20MIN.met

Acquired: 16-07-2020 19:22:57 (GMT +05:30)

Printed: 17-07-2020 10:47:24 (GMT +05:30)

Vial No: 52 Injection Volume: 50

Data Description : {Data Description}

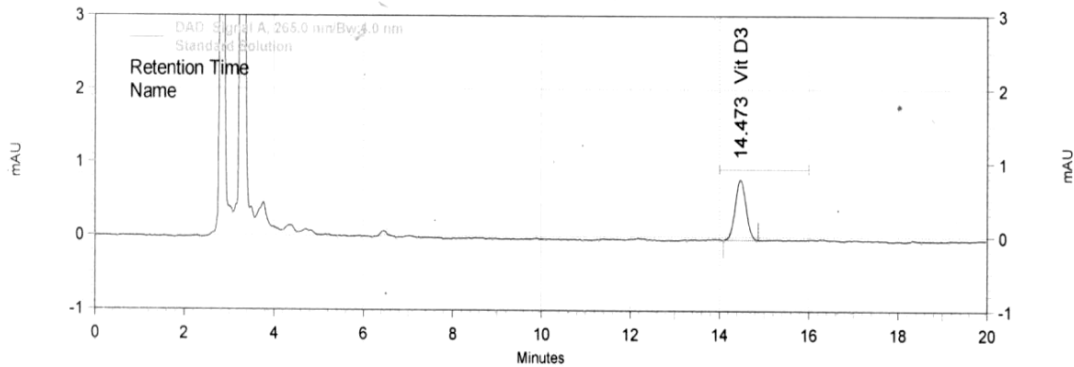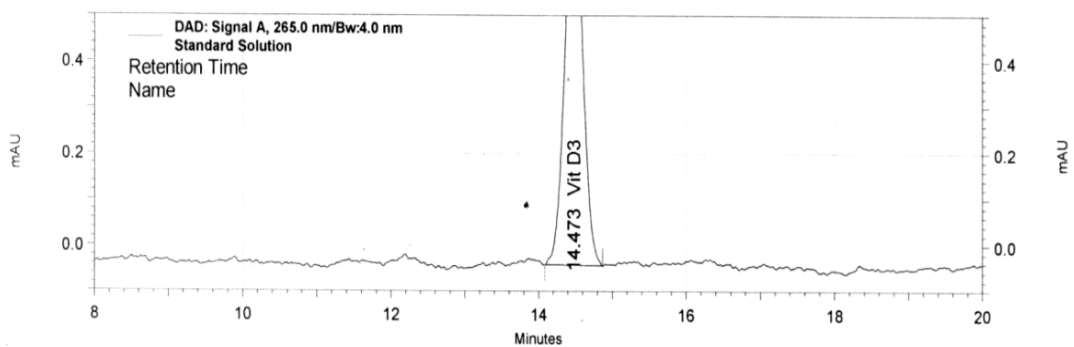

DAD: Signal A,  
265.0 nm/Bw:4.0  
nm Results

| Name   | Retention Time | Area    | Theoretical plates<br>(USP) | Asymmetry |
|--------|----------------|---------|-----------------------------|-----------|
| Vit D3 | 14.47          | 1861126 | 16479                       | 1.04      |
| Totals |                | 1861126 |                             |           |

Figure S3. HPLC Chromatograms of vitamin D3
